# Supplementary material
Source: Springer Nature journal article supplement (https://www.springermedizin.de/resource/supplementary/12890_2009_156_MOESM2_ESM.pdf/9506104)
Supplement: MOESM2 [file 9506104]

**CAPTION PROJECT**  
**Community-Acquired Pneumonia: Towards Improving Outcomes Nationally**

**Intervention activity log**

This log provides the CAPTION project with a description of how the CAP educational intervention was carried out in your hospital. Please complete and return to your State Project Officer.

**To be completed by hospital coordinator:**

Hospital ID \_\_\_\_\_

Please complete for as many group session(s) as were carried out:

| ED Staff                           | Group session 1 - Number of staff participating | Group session 2 - Number of staff participating | Group session 3 - Number of staff participating | How many staff attended at least one session? |
|------------------------------------|-------------------------------------------------|-------------------------------------------------|-------------------------------------------------|-----------------------------------------------|
| <b>Date</b>                        | _ _ / _ _ / _ _                                 | _ _ / _ _ / _ _                                 | _ _ / _ _ / _ _                                 |                                               |
| <b>Doctors</b>                     |                                                 |                                                 |                                                 |                                               |
| Interns                            |                                                 |                                                 |                                                 |                                               |
| Resident Medical Officer           |                                                 |                                                 |                                                 |                                               |
| Registrar                          |                                                 |                                                 |                                                 |                                               |
| Physicians/Staff specialist        |                                                 |                                                 |                                                 |                                               |
| General Practitioners              |                                                 |                                                 |                                                 |                                               |
| Other Medical Practitioner         |                                                 |                                                 |                                                 |                                               |
| <b>Nurses</b>                      |                                                 |                                                 |                                                 |                                               |
| Nurse unit manager                 |                                                 |                                                 |                                                 |                                               |
| Clinical nurse consultant/educator |                                                 |                                                 |                                                 |                                               |
| Clinical nurse specialist          |                                                 |                                                 |                                                 |                                               |
| Registered nurse                   |                                                 |                                                 |                                                 |                                               |
| Enrolled nurse                     |                                                 |                                                 |                                                 |                                               |
| <b>ED (other)</b>                  |                                                 |                                                 |                                                 |                                               |
| ED pharmacist                      |                                                 |                                                 |                                                 |                                               |
| Other (specify)                    |                                                 |                                                 |                                                 |                                               |

Average duration of group sessions? \_\_\_\_\_

**Please complete for one-on-one sessions:**

| <b>ED Staff</b>                    | <b>Number of staff who had a one-on-one session</b> | <b>Average duration of session</b> |
|------------------------------------|-----------------------------------------------------|------------------------------------|
| <b>Doctors</b>                     |                                                     |                                    |
| Interns                            |                                                     |                                    |
| Resident Medical Officer           |                                                     |                                    |
| Registrar                          |                                                     |                                    |
| Physicians/Staff specialist        |                                                     |                                    |
| General Practitioners              |                                                     |                                    |
| Other Medical Practitioner         |                                                     |                                    |
| <b>Nurses</b>                      |                                                     |                                    |
| Nurse unit manager                 |                                                     |                                    |
| Clinical nurse consultant/educator |                                                     |                                    |
| Clinical nurse specialist          |                                                     |                                    |
| Registered nurse                   |                                                     |                                    |
| Enrolled nurse                     |                                                     |                                    |
| <b>ED (other)</b>                  |                                                     |                                    |
| ED pharmacist                      |                                                     |                                    |
| Other (specify)                    |                                                     |                                    |

Did any staff receive >1 one-on-one education session? Yes    No

Please explain which staff received >1 one-on-one education session(s) and why?

---



---

Was the detailing card used in one-on-one education sessions? (please circle): *Always* *Sometimes* *Never*

Was power-point template used in group education sessions (please circle): Yes No

Number of posters distributed in ED \_\_\_\_\_ Number of leaflets distributed in ED \_\_\_\_\_

Number of other educational materials distributed in ED -please specify type/number : \_\_\_\_\_

Any problems/barriers/solutions encountered during the educational sessions?

---



---

Thank you for your feedback.  
Please return your completed log to your State project officer
